# Supplementary material
Source: Research Square preprint supplement (doi:10.21203/rs.3.rs-9692624/v1)
Supplement: Supplementary file 1 [file 6730073279ddfd2d8cc9be2c.pdf]

1 **Supplementary Information**

2

3 **Identifying major environmental factors of early-stage decomposition**  
4 **dynamics in *Pinus halepensis* and *Pinus brutia* stands**

5 Efstathia D. Mantzari<sup>1\*</sup>, Nikoleta Eleftheriadou<sup>2</sup>, Georgios Xanthopoulos<sup>3</sup>, Alexandros Gkouvas<sup>2</sup>,  
6 Christodoulos Sazeides<sup>1</sup>, Natasa Kiorapostolou<sup>3</sup>, Evdoxia Bintsi- Frantzi<sup>1</sup>, Nikos Markos<sup>3</sup>, Gavriil  
7 Spyroglou<sup>3</sup>, Elena Vanguelova<sup>4</sup>, Kalliopi Radoglou<sup>2</sup>, Mariangela Fotelli<sup>3</sup>, Nikolaos M. Fyllas<sup>5</sup>, Panayiotis G.  
8 Dimitrakopoulos<sup>1</sup>

9 <sup>1</sup> *Biodiversity Conservation Laboratory, Department of Environment, University of the Aegean, 81132*  
10 *Mytilene, Greece*

11 <sup>2</sup> *Department of Forestry and Management of Environment and Natural Resources, Democritus University*  
12 *of Thrace, 68200 Orestiada, Greece*

13 <sup>3</sup> *Forest Research Institute, Hellenic Agricultural Organization - Dimitra, 57006 Thessaloniki, Greece*

14 <sup>4</sup> *Centre for Forest Protection, Forest Research, Alice Holt, Farnham, England, United Kingdom of Great*  
15 *Britain and Northern Ireland*

16 <sup>5</sup> *Section of Ecology & Taxonomy, Department of Biology, National and Kapodistrian University of Athens,*  
17 *15701 Athens, Greece*

18 \*corresponding author: [envd21005@env.aegean.gr](mailto:envd21005@env.aegean.gr)

19

20 **A. Hierarchical structure of dataset analysis through NLMMs**

21 **Table S1:** Average ( $\pm$  standard error) decomposition rates  $k$  ( $\text{day}^{-1}$ ) per plot and site for all materials. Average  
 22 decomposition rates per plot were estimated after fitting a generic Olson decay  $M(t) = M_0 e^{-k \cdot t}$  model for each plot,  
 23 using incubation time ( $t$  - days) and species as predictors.

| <i>Plot</i> | <i>k<sub>litter</sub></i> | <i>k<sub>paper</sub></i> | <i>k<sub>wood</sub></i> |
|-------------|---------------------------|--------------------------|-------------------------|
| <i>LES1</i> | 0.000694 $\pm$ 0.000052   | 0.000659 $\pm$ 0.000432  | 0.000340 $\pm$ 0.000079 |
| <i>LES2</i> | 0.000545 $\pm$ 0.000052   | 0.000329 $\pm$ 0.000432  | 0.000435 $\pm$ 0.000079 |
| <i>LES3</i> | 0.000584 $\pm$ 0.000052   | 0.000429 $\pm$ 0.000432  | 0.000388 $\pm$ 0.000079 |
| <i>LES4</i> | 0.000621 $\pm$ 0.000052   | 0.000628 $\pm$ 0.000432  | 0.000443 $\pm$ 0.000079 |
| <i>SAN1</i> | 0.001855 $\pm$ 0.000159   | 0.004072 $\pm$ 0.001225  | 0.001963 $\pm$ 0.000232 |
| <i>SAN2</i> | 0.001696 $\pm$ 0.000159   | 0.000937 $\pm$ 0.001225  | 0.001444 $\pm$ 0.000232 |
| <i>SAN3</i> | 0.001649 $\pm$ 0.000159   | 0.002581 $\pm$ 0.001225  | 0.001616 $\pm$ 0.000232 |
| <i>XAN1</i> | 0.000705 $\pm$ 0.000052   | 0.002642 $\pm$ 0.000432  | 0.000650 $\pm$ 0.000232 |
| <i>XAN2</i> | 0.000604 $\pm$ 0.000052   | 0.002874 $\pm$ 0.000432  | 0.000754 $\pm$ 0.000232 |
| <i>XAN3</i> | 0.000565 $\pm$ 0.000052   | 0.002263 $\pm$ 0.000432  | 0.000695 $\pm$ 0.000232 |

24

25 **B. Correlation among micro-climatic parameters**

26 Correlation matrix was produced to identify the correlated variables and avoid them during the  
 27 exploration of the main drivers for all decomposition materials (pine litter, paper and woods). It  
 28 was produced using the “ggcorrplot” and “car” packages in R.

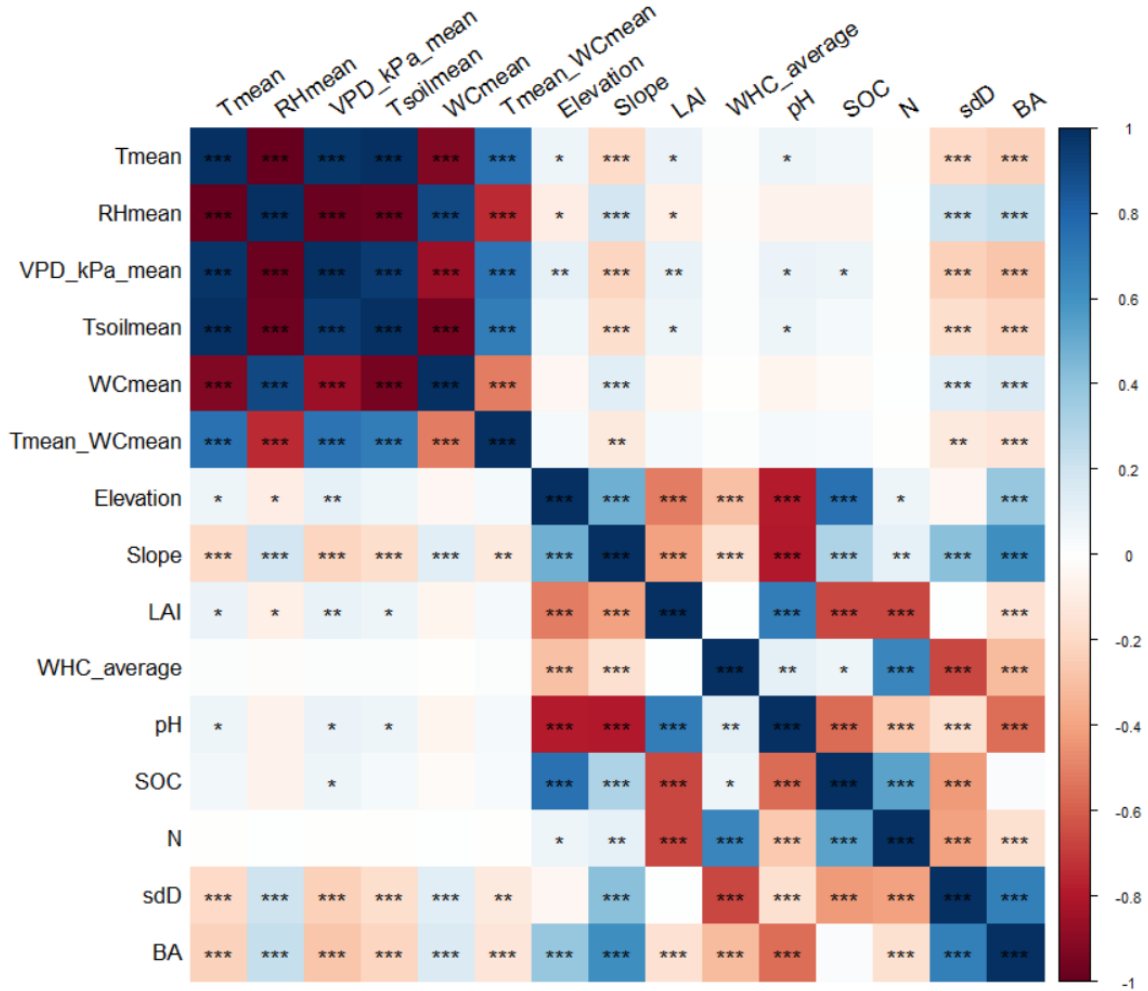

29

30 **Figure S1:** Correlation matrix showing correlation among the various micro-environmental factors. Color gradient  
 31 (blue to red) represents high positive correlation to high negative correlation. (\*):  $p < 0.05$ , (\*\*):  $p < 0.01$ , (\*\*\*) :  $p < 0.001$

32 **C. Stepwise elimination of micro-climatic parameters**

33 *Pine litter*

34 **Table S2:** Stepwise elimination of micro-climatic factors in pine litter decomposition. All predictors were scaled on each sub-set, and the scaled values are presented here.

35 Coefficient of relation  $R_{pseudo}^2$  was calculated using Pearsons' correlation between observed and simulated values (from both fixed and random effects) of remaining mass

|   | <i>Intercept</i> | $T_{air}$ | $T_{soil}$ | <i>SWC</i> | <i>Elevation</i> | <i>LAI</i>   | <i>pH</i>    | <i>SOC</i>   | <i>N</i>     | <i>BA</i> | <i>AIC</i> | <i>Marginal R<sup>2</sup></i> | <i>Conditional R<sup>2</sup></i> | $R_{pseudo}^2$ |
|---|------------------|-----------|------------|------------|------------------|--------------|--------------|--------------|--------------|-----------|------------|-------------------------------|----------------------------------|----------------|
| 1 | $k_{fe}$         | 0.000071  | 0.000101   | 0.000127   | -                | -0.000279    | 0.000229     | 0.000129     | -0.000234    | 0.000089  | -282.969   | 76.75%                        | 81.50%                           | 82.06          |
|   | <b>VIF</b>       | 0.000985  | 11.337     | 7.089      | 2.479            | 9.929        | 3.941        | 6.048        | 6.993        | 4.013     | 2.237      |                               |                                  |                |
|   | <i>p</i>         |           | 0.568      | 0.421      | <b>0.006</b>     | <b>0.008</b> | <b>0.046</b> | 0.173        | 0.460        | 0.091     | 0.346      |                               |                                  |                |
| 2 | $k_{fe}$         | 0.000070  | 0.000102   | 0.000126   |                  | -0.000301    | 0.000503     | -0.000259    | 0.000003     | 0.000079  | -278.9     | 72.20%                        | 82.23%                           | 82.21%         |
|   | <b>VIF</b>       | 0.000984  | 9.867      | 6.548      | 2.377            |              | 3.941        | 3.880        | 2.234        | 2.167     |            |                               |                                  |                |
|   | <i>p</i>         |           | 0.570      | 0.415      | <b>0.005</b>     |              | 0.101        | <b>0.006</b> | 0.061        | 0.985     | 0.531      |                               |                                  |                |
| 3 | $k_{fe}$         | 0.000070  | 0.000102   | 0.000126   |                  | -0.000303    | 0.000504     | -0.000258    |              | 0.000079  | -280.9     | 72.20%                        | 82.22%                           | 82.22%         |
|   | <b>VIF</b>       | 0.000984  | 9.866      | 6.548      | 2.377            |              | 2.731        | 3.687        |              | 2.143     |            |                               |                                  |                |
|   | <i>p</i>         |           | 0.568      | 0.413      | <b>0.005</b>     |              | <b>0.044</b> | <b>0.004</b> |              | 0.528     |            |                               |                                  |                |
| 4 | $k_{fe}$         | 0.000068  | 0.000102   | 0.000125   |                  | -0.000280    | 0.000431     | -0.000285    |              |           | -282.476   | 71.66%                        | 82.38%                           | 82.22%         |
|   | <b>VIF</b>       | 0.000982  | 8.787      | 6.148      | 2.308            |              | 2.490        | 1.945        | 2.036        |           |            |                               |                                  |                |
|   | <i>p</i>         |           | 0.580      | 0.410      | <b>0.005</b>     |              | 0.058        | <b>0.001</b> | <b>0.029</b> |           |            |                               |                                  |                |
| 5 | $k_{fe}$         | 0.000071  | 0.000102   | 0.000127   |                  |              | 0.000306     | -0.000170    |              |           |            |                               |                                  |                |
|   | <b>VIF</b>       | 0.000984  | 8.486      | 6.032      | 2.289            |              |              | 1.526        | 1.536        |           | -281.179   | 67.36%                        | 83.16%                           | 82.29%         |
|   | <i>p</i>         |           | 0.557      | 0.408      | <b>0.005</b>     |              |              | <b>0.024</b> | 0.206        |           |            |                               |                                  |                |
| 6 | $k_{fe}$         | 0.000071  | 0.000102   | 0.000127   |                  |              | 0.000402     |              |              |           |            |                               |                                  |                |
|   | <b>VIF</b>       | 0.000984  | 8.223      | 5.931      | 2.271            |              |              | 1.006        |              |           | -281.59    | 64.93%                        | 83.16%                           | 82.30%         |
|   | <i>p</i>         |           | 0.556      | 0.409      | <b>0.004</b>     |              |              | <b>0.001</b> |              |           |            |                               |                                  |                |

36

37 *Cellulose papers*

38 **Table S3:** Stepwise elimination of micro-climatic factors in paper sheets decomposition. All predictors were scaled on each sub-set, and the scaled values are presented here.

39 Coefficient of relation  $R_{pseudo}^2$  was calculated using Pearsons' correlation between observed and simulated values (from both fixed and random effects) of remaining mass

|   | <i>Intercept</i>      | <i>T<sub>air</sub></i> | <i>T<sub>soil</sub></i> | <i>SWC</i>   | <i>Elevation</i> | <i>LAI</i>       | <i>pH</i>        | <i>SOC</i>   | <i>N</i>         | <i>BA</i>        | <i>AIC</i> | <i>Marginal R<sup>2</sup></i> | <i>Conditional R<sup>2</sup></i> | <i>R<sup>2</sup><sub>pseudo</sub></i> |         |
|---|-----------------------|------------------------|-------------------------|--------------|------------------|------------------|------------------|--------------|------------------|------------------|------------|-------------------------------|----------------------------------|---------------------------------------|---------|
| 1 | <i>k<sub>fe</sub></i> | 0.001432               | 0.000211                | 0.000598     | -                | -                | -0.001714        | 0.000789     | 0.000597         | -                | 0.000888   | -501.248                      | 80.26%                           | 83.96 %                               | 84.41 % |
|   | <b>VIF</b>            | 16.883                 | 10.987                  | 2.860        | 9.114            | 4.116            | 5.804            | 6.570        | 4.062            | 2.107            |            |                               |                                  |                                       |         |
|   | <b>p</b>              | 0.238                  | <b>&lt;0.001</b>        | <b>0.008</b> | <b>&lt;0.001</b> | <b>&lt;0.001</b> | <b>&lt;0.001</b> | <b>0.013</b> | <b>&lt;0.001</b> | <b>&lt;0.001</b> |            |                               |                                  |                                       |         |
| 2 | <i>k<sub>fe</sub></i> | 0.001434               | 0.000205                | 0.000595     | -                | -                | -0.001771        | 0.001417     | -0.000264        | -                | 0.000878   | -491.427                      | 73.96 %                          | 84.47 %                               | 84.44 % |
|   | <b>VIF</b>            | 15.569                 | 10.448                  | 2.796        | 2.796            | 4.116            | 3.800            | 2.190        | 2.278            | 2.070            |            |                               |                                  |                                       |         |
|   | <b>p</b>              | 0.251                  | <b>&lt;0.001</b>        | <b>0.007</b> | <b>&lt;0.001</b> | <b>&lt;0.001</b> | <b>&lt;0.001</b> | 0.281        | <b>0.028</b>     | <b>&lt;0.001</b> |            |                               |                                  |                                       |         |
| 3 | <i>k<sub>fe</sub></i> | 0.001436               | 0.000205                | 0.000595     | -                | -                | -0.001710        | 0.001549     | -                | -                | 0.000953   | -492.291                      | 72.94 %                          | 72.94 %                               | 84.82 % |
|   | <b>VIF</b>            | 15.414                 | 10.376                  | 2.790        | 2.790            | 3.955            | 3.351            | 2.198        | 1.947            |                  |            |                               |                                  |                                       |         |
|   | <b>p</b>              | 0.249                  | <b>&lt;0.001</b>        | <b>0.007</b> | <b>&lt;0.001</b> | <b>&lt;0.001</b> | <b>&lt;0.001</b> | <b>0.020</b> | <b>&lt;0.001</b> |                  |            |                               |                                  |                                       |         |

40

#### 41 *Recalcitrant wood sticks*

42 **Table S4:** Stepwise elimination of micro-climatic factors in wood sticks decomposition. All predictors were scaled on each sub-set, and the scaled values are presented here.

43 Coefficient of relation  $R_{pseudo}^2$  was calculated using Pearsons' correlation between observed and simulated values (from both fixed and random effects) of remaining mass

|   | <i>Intercept</i>      | <i>T<sub>air</sub></i> | <i>T<sub>soil</sub></i> | <i>SWC</i>       | <i>Elevation</i> | <i>LAI</i>       | <i>pH</i>    | <i>SOC</i>   | <i>N</i>         | <i>BA</i>    | <i>AIC</i> | <i>Marginal R<sup>2</sup></i> | <i>Conditional R<sup>2</sup></i> | <i>R<sup>2</sup><sub>pseudo</sub></i> |        |        |
|---|-----------------------|------------------------|-------------------------|------------------|------------------|------------------|--------------|--------------|------------------|--------------|------------|-------------------------------|----------------------------------|---------------------------------------|--------|--------|
| 1 | <i>k<sub>fe</sub></i> | 0.000730               | 0.000039                | 0.000139         | -0.000172        | -                | 0.000808     | -0.000369    | 0.000137         | 0.000330     | -          | 0.000180                      | -553.53                          | 62.42%                                | 64.69% | 64.69% |
|   | <b>VIF</b>            | 16.893                 | 10.990                  | 2.867            | 9.108            | 3.880            | 5.949        | 6.748        | 3.870            | 2.152        |            |                               |                                  |                                       |        |        |
|   | <b>p</b>              | 0.767                  | <b>0.251</b>            | <b>&lt;0.001</b> | <b>&lt;0.001</b> | <b>&lt;0.001</b> | <b>0.203</b> | <b>0.004</b> | <b>&lt;0.001</b> | <b>0.004</b> |            |                               |                                  |                                       |        |        |
| 2 | <i>k<sub>fe</sub></i> | 0.000740               | 0.000047                | 0.000137         | -0.000167        | -                | -            | -0.000394    | 0.000541         | -0.000254    | -          | 0.000169                      | -539.073                         | 50.23%                                | 65.08% | 65.08% |
|   | <b>VIF</b>            | 15.746                 | 10.538                  | 2.811            | 2.811            | 3.877            | 3.819        | 2.247        | 2.238            | 2.117        |            |                               |                                  |                                       |        |        |
|   | <b>p</b>              | 0.722                  | <b>0.258</b>            | <b>&lt;0.001</b> | <b>&lt;0.001</b> | <b>0.047</b>     | <b>0.006</b> | 0.096        | 0.882            | 0.231        |            |                               |                                  |                                       |        |        |
| 3 | <i>k<sub>fe</sub></i> | 0.000738               | 0.000045                | 0.000137         | -0.000168        | -                | -            | -0.000364    | 0.000395         | -0.000308    | -          | 0.000044                      | -539.684                         | 47.53%                                | 65.10% | 65.10% |
|   | <b>VIF</b>            | 14.579                 | 10.083                  | 2.745            | 2.745            | 3.752            | 2.238        | 2.111        | 2.207            |              |            |                               |                                  |                                       |        |        |

|          |                       |          |          |          |                  |           |              |              |       |           |        |        |        |
|----------|-----------------------|----------|----------|----------|------------------|-----------|--------------|--------------|-------|-----------|--------|--------|--------|
|          | <i>p</i>              |          | 0.736    | 0.258    | <b>&lt;0.001</b> | 0.083     | <b>0.017</b> | <b>0.049</b> | 0.785 |           |        |        |        |
|          | <i>k<sub>fe</sub></i> |          | 0.000045 | 0.000137 | -0.000168        | -0.000330 | 0.000378     | -0.000319    |       |           |        |        |        |
| <b>4</b> | <b>VIF</b>            | 0.000738 | 14.573   | 10.083   | 2.744            | 2.452     | 1.935        | 1.980        |       | -514.608  | 47.48% | 65.10% | 65.10% |
|          | <i>p</i>              |          | 0.735    | 0.257    | <b>&lt;0.001</b> | 0.051     | <b>0.013</b> | <b>0.036</b> |       |           |        |        |        |
|          | <i>k<sub>fe</sub></i> |          | 0.000046 | 0.000136 | -0.000167        |           | 0.000332     |              |       |           |        |        |        |
| <b>5</b> | <b>VIF</b>            | 0.000742 | 14.036   | 9.881    | 2.712            |           | 1.007        |              |       | -540.9996 | 39.25% | 65.12% | 65.12% |
|          | <i>p</i>              |          | 0.728    | 0.259    | <b>&lt;0.001</b> |           | <b>0.015</b> |              |       |           |        |        |        |

44
